# Supplementary material for: Large-Scale Production of Compound Bubbles Using Parallelized Microfluidics for Efficient Extraction of Metal Ions
Source: Royal Society of Chemistry journal article supplement (doi:10.1039/c8lc01267a), 2019-01-01
Supplement: c8lc01267a3.pdf [file c8lc01267a3.pdf]

**Electronic Supplementary Information for**

**Large-Scale Production of Compound Bubbles Using**

**Parallelized Microfluidics for Efficient Extraction of Metal**

**Ions**

Heon-Ho Jeong <sup>a,b</sup>, Zhuo Chen <sup>a,d</sup>, Sagar Yadavali <sup>c</sup>, Jianhong Xu <sup>d</sup>, David Issadore <sup>a,c,e,\*</sup>,

Daeyeon Lee <sup>a,\*</sup>

*<sup>a</sup> Department of Chemical and Biomolecular Engineering, University of Pennsylvania, Philadelphia, Pennsylvania 19104, United States*

*<sup>b</sup> Department of Chemical and Biomolecular Engineering, Chonnam National University, Yeosu, Jeonnam 59626, Republic of Korea*

*<sup>c</sup> Department of Bioengineering, University of Pennsylvania, Philadelphia, Pennsylvania 19104, United States*

*<sup>d</sup> The State Key Laboratory of Chemical Engineering, Department of Chemical Engineering, Tsinghua University, Beijing 100084, China*

*<sup>e</sup> Electrical and Systems Engineering, School of Engineering and Applied Sciences, University of Pennsylvania, Philadelphia, Pennsylvania 19104, United States*

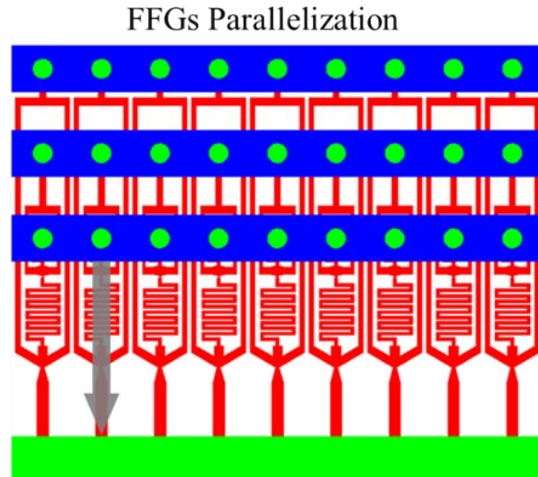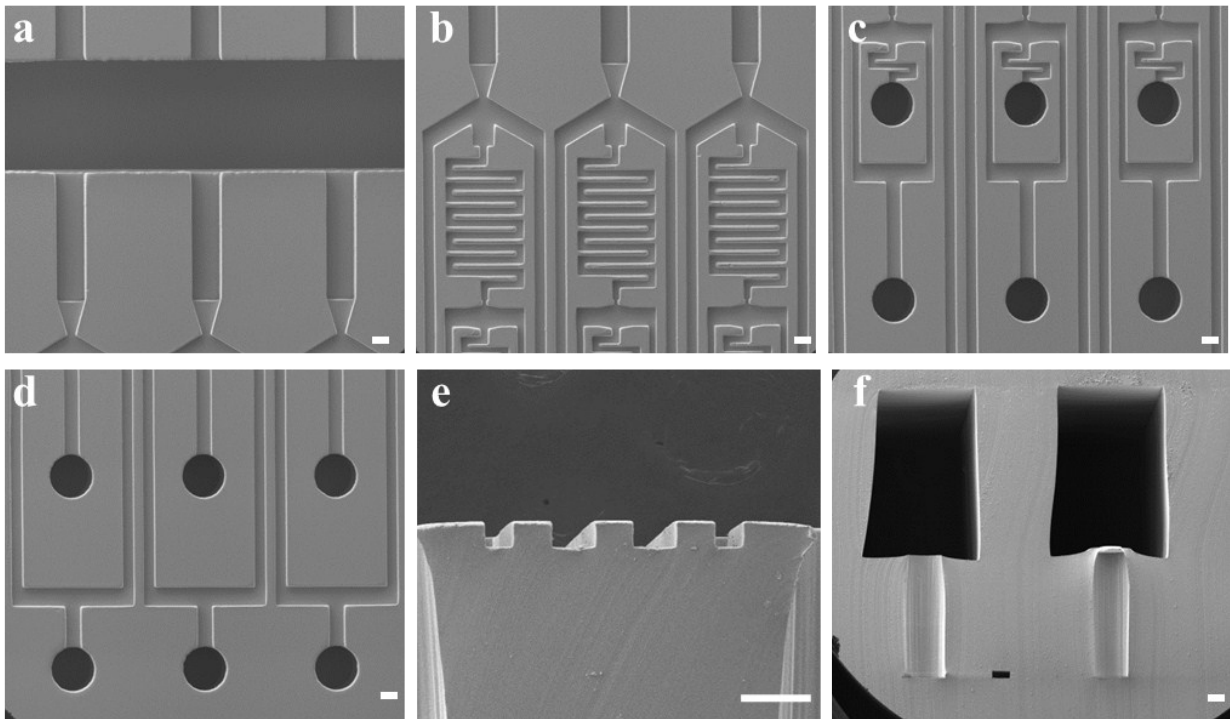

**Figure S1.** Scanning electron micrograph images of compound bubble flow focusing generator device. (a-d) Top view images of device at different positions. (e) Cross section view of device at position shown in (c). (f) Cross section of device shows delivery channels and vias. Scale bars in all images are 100  $\mu\text{m}$ .

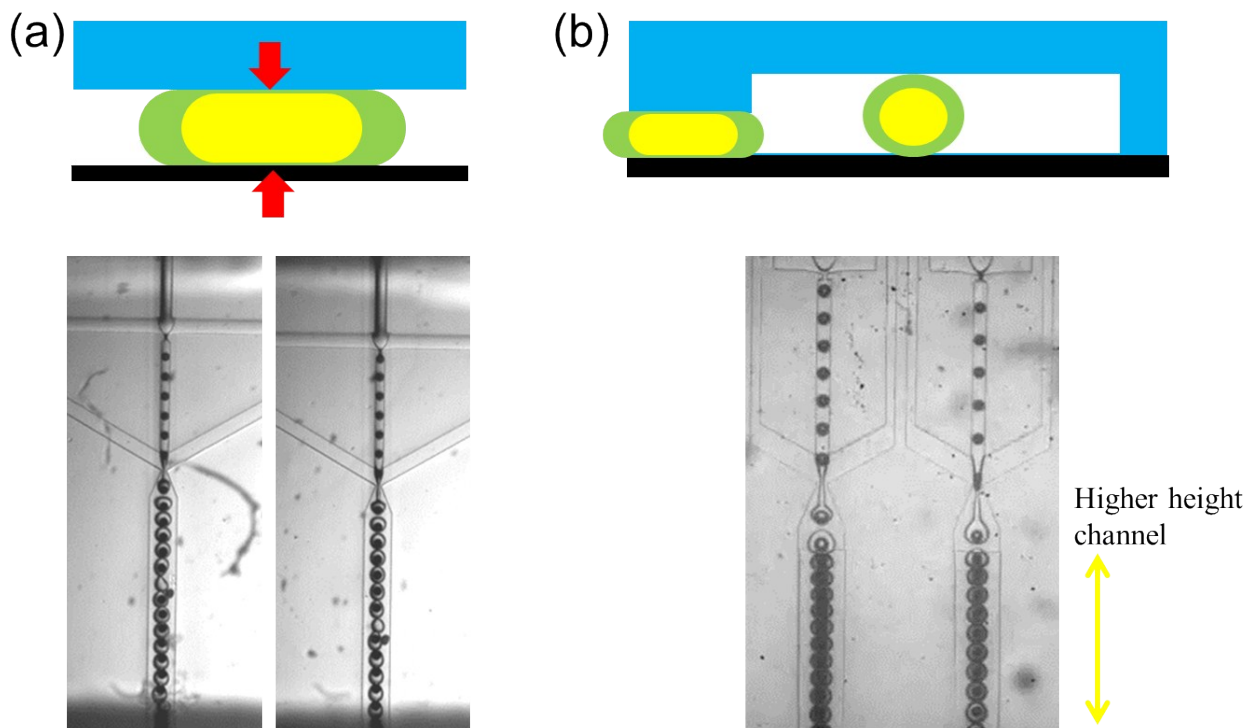

**Figure S2.** Schematic illustration and optical micrographs showing compound bubble generation in (a) single-height channels and (b) dual-height channels. In both panels, the width of the collection channels is 150  $\mu\text{m}$ .

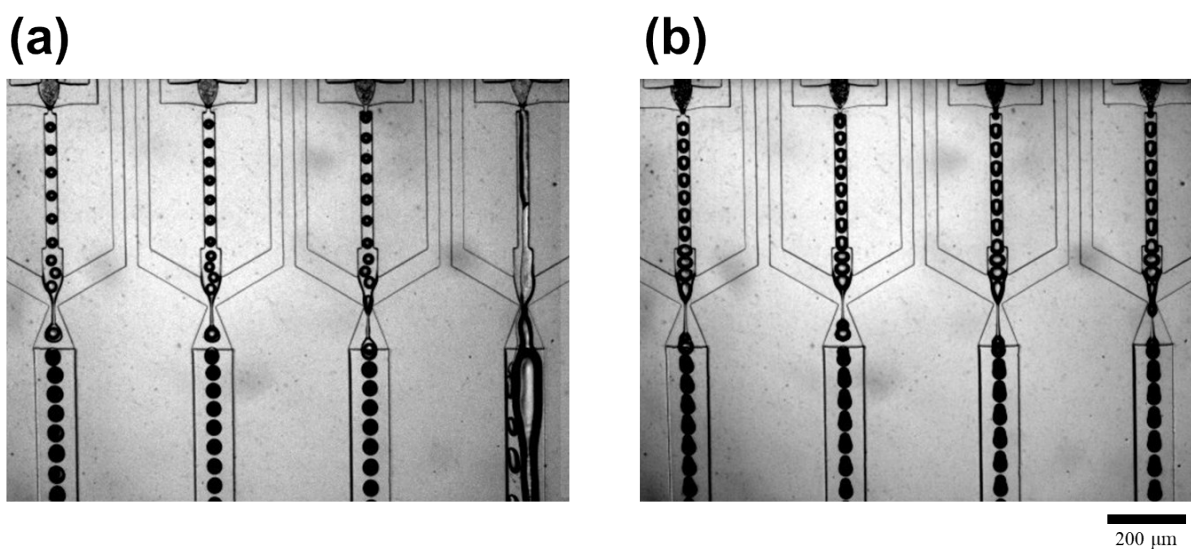

**Figure S3.** Representative micrographs showing (a) jetting and (b) doublet formation upon gas pressure increase.

**Movie.** Production of gas-in-water-in-oil compound bubbles from a 400-parallel flow focusing generator (FFG) device.

AutoCAD file of the 400-FFG device,
